# Supplementary material
Source: PubMed Central journal article supplement (PMC3412036)
Supplement: 1204302109_pnas.201204302SI.pdf [file 1204302109_pnas.201204302SI.pdf]

# Supporting Information

Jeong et al. 10.1073/pnas.1204302109

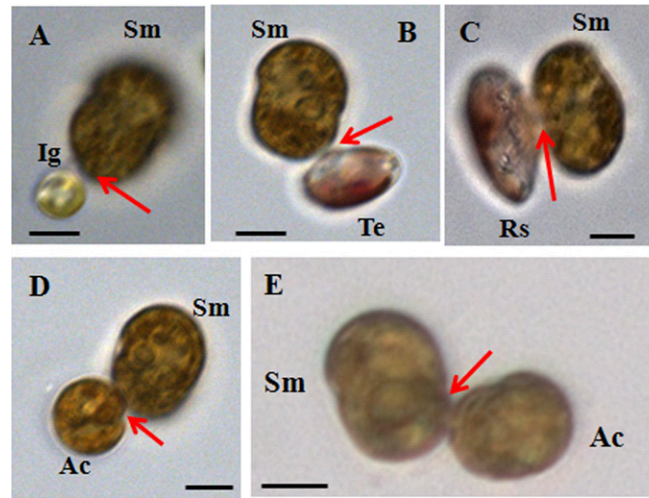

**Fig. S1.** Feeding of free-living *Symbiodinium* cells on diverse prey. Light microscopy images showing *Symbiodinium* cells (Sm) feeding on the haptophyte *Isochrysis galbana* (Ig; A), the cryptophyte *Teleaulax* sp. (Te; B), the cryptophyte *Rhodomonas salina* (Rs; C), and the dinoflagellate *Amphidinium carterae* (Ac; D and E) using a peduncle (arrows). (Scale bars: 5  $\mu$ m.)

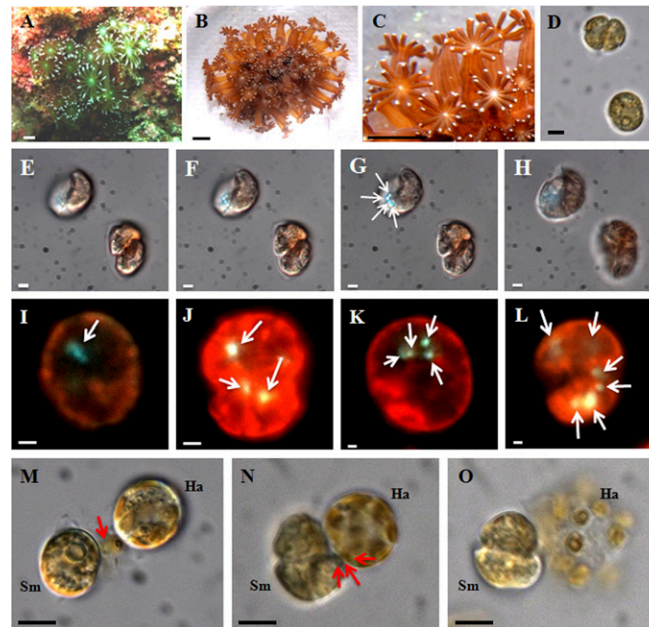

**Fig. S2.** Host coral and feeding of cultured *Symbiodinium* acquired from the tissues of the coral *Alveopora japonica* on diverse prey. (A–C) *A. japonica* with many polyps collected by a diver at a depth of ~6 m off Sindo, Jeju Island, Korea, in August 2011. Photos were taken with a digital camera. (D) Motile cells of cultured *Symbiodinium* originally isolated from the coral. (E–H) Scanning images obtained from the upper and lower surfaces by epifluorescence microscopy (EFM), showing a *Symbiodinium* cell containing four ingested bacterium-sized fluorescent beads (1  $\mu$ m diameter; bright-blue inclusion, arrows). EFM was used to ensure that the beads were located inside the protoplasm of the *Symbiodinium* cell. (I and J) Between one and three ingested fluorescently labeled bacteria (bright-yellow or greenish inclusions, arrows) inside the protoplasm of *Symbiodinium* cells observed under EFM. (K and L) Ingested fluorescently labeled *Synechococcus* sp. (bright-yellow or greenish inclusions, arrows) inside the protoplasm of *Symbiodinium* cells observed under EFM. (M–O) Feeding by *Symbiodinium* cells (Sm) on an *Heterosigma akashiwo* cell (Ha). (M) A chloroplast of *H. akashiwo* (Ha) was sucked by a *Symbiodinium* cell (Sm) through a peduncle (arrow). (N) A *Symbiodinium* cell (Sm) sucking materials (arrows) from an *H. akashiwo* cell (Ha) through a peduncle. (O) Collapse and bursting of the prey cell. (Scale bars: 5 mm for A–C, 5  $\mu$ m for D and M–O, 2  $\mu$ m for I and J, and 1  $\mu$ m for E–H, K, and L.)

**Table S1. Taxa, sizes, and concentrations of prey species offered as food to free-living *Symbiodinium* sp. (clade E) and microbeads in experiment 1**

| Species                                | Equivalent spherical diameter, $\mu\text{m}$ ( $\pm$ SD) | Initial prey concentration, cells $\text{mL}^{-1}$ | Feeding by <i>Symbiodinium</i> |
|----------------------------------------|----------------------------------------------------------|----------------------------------------------------|--------------------------------|
| <b>Bacteria</b>                        |                                                          |                                                    |                                |
| Heterotrophic bacteria                 | 0.9 (0.3)                                                | 7,000,000                                          | Y                              |
| <i>Synechococcus</i> sp.               | 1.0 (0.2)                                                | 7,000,000                                          | Y                              |
| <b>Diatoms</b>                         |                                                          |                                                    |                                |
| <i>Skeletonema costatum</i>            | 5.9 (1.1)                                                | 150,000                                            | N                              |
| <b>Prymnesiophyceae</b>                |                                                          |                                                    |                                |
| <i>Isochrysis galbana</i>              | 4.8 (0.2)                                                | 150,000                                            | Y                              |
| <b>Cryptophytes</b>                    |                                                          |                                                    |                                |
| <i>Teleaulex</i> sp.                   | 5.6 (1.5)                                                | 100,000                                            | Y                              |
| <i>Rhodomonas salina</i>               | 8.8 (1.5)                                                | 50,000                                             | Y                              |
| <b>Rhaphidophytes</b>                  |                                                          |                                                    |                                |
| <i>Heterosigma akashiwo</i>            | 11.5 (1.9)                                               | 30,000                                             | Y                              |
| <b>Mixotrophic dinoflagellates</b>     |                                                          |                                                    |                                |
| <i>Heterocapsa rotundata</i> (T)       | 5.8 (0.4)                                                | 100,000                                            | Y                              |
| <i>Amphidinium carterae</i> (NT)       | 9.7 (1.6)                                                | 30,000                                             | Y                              |
| <i>Prorocentrum minimum</i> (T)        | 12.1 (2.5)                                               | 15,000–20,000                                      | N                              |
| <i>Heterocapsa triquetra</i> (T)       | 15.0 (4.3)                                               | 15,000–20,000                                      | N                              |
| <i>Scrippsiella trochoidea</i> (T)     | 22.8 (2.7)                                               | 10,000–20,000                                      | N                              |
| <i>Cochlodinium polykrikoides</i> (NT) | 25.9 (2.9)                                               | 1,000–3,000                                        | N                              |
| <i>Prorocentrum micans</i> (T)         | 26.6 (2.8)                                               | 1,000–3,000                                        | N                              |
| <i>Akashiwo sanguinea</i> (NT)         | 30.8 (3.5)                                               | 1,000–3,000                                        | N                              |
| <i>Gonyaulax polygramma</i> (T)        | 32.5 (5.4)                                               | 1,500–3,000                                        | N                              |
| <i>Alexandrium tamarense</i> (T)       | 32.6 (2.7)                                               | 1,000–3,000                                        | N                              |
| <i>Lingulodinium polyedrum</i> (T)     | 38.2 (3.6)                                               | 1,000–3,000                                        | N                              |
| <b>Microbeads</b>                      |                                                          |                                                    |                                |
| 0.5- $\mu\text{m}$ bead                | 0.5                                                      | 1,000,000                                          | Y                              |
| 1- $\mu\text{m}$ bead                  | 1                                                        | 1,000,000                                          | Y                              |
| 2- $\mu\text{m}$ bead                  | 2                                                        | 1,000,000                                          | Y                              |
| 3- $\mu\text{m}$ bead                  | 3                                                        | 1,000,000                                          | N                              |
| 4- $\mu\text{m}$ bead                  | 4                                                        | 1,000,000                                          | N                              |

To confirm that the predators did not ingest certain prey species, additional higher prey concentrations were provided. Y, *Symbiodinium* fed on a living food cell; N, *Symbiodinium* did not feed on a living food cell. The mean equivalent spherical diameters for algae and bacteria were measured with an electronic particle counter (Coulter Multisizer II) and under an epifluorescence microscope, respectively ( $n > 2,000$  for each algal species and  $n > 30$  for each bacterium). The abundance of the predator for each target prey was 2,000–5,000 cells  $\text{mL}^{-1}$ . T, thecate; NT, nonthecate.

**Table S2. Duration of each stage of the feeding process of free-living *Symbiodinium* on *H. akashiwo* prey**

| Stage | $n$ | Time, s, range | Time, s, mean $\pm$ SE |
|-------|-----|----------------|------------------------|
| 1     | 10  | 2.0–4.0        | 3.1 $\pm$ 0.2          |
| 2     | 10  | 540–1,140      | 812 $\pm$ 53           |
| 3     | 10  | 50–470         | 260 $\pm$ 31           |
| 4     | 5   | 185–520        | 315 $\pm$ 50           |

Stage 1: The *Symbiodinium* cell deployed a tow filament and attached a peduncle to a prey cell. Stage 2: The *Symbiodinium* cell fed on the prey cell with spinning. Stage 3: The *Symbiodinium* cell stopped spinning, continued to suck chloroplasts from prey cell, and caused the prey cell to burst. Stage 4: The *Symbiodinium* cell sucked more chloroplasts from the burst *H. akashiwo* cell.

**Table S3. Nitrogen acquisition of free-living *Symbiodinium* from the algal prey *Synechococcus* sp. and *Heterosigma akashiwo***

| Prey species             | Nutrition condition | $I_{max}$ , prey cells <i>Symbiodinium</i> <sup>-1</sup> d <sup>-1</sup> | NPA, pg N cell <sup>-1</sup> | ANPD, pg N <i>Symbiodinium</i> <sup>-1</sup> d <sup>-1</sup> | NPP, pg N <i>Symbiodinium</i> <sup>-1</sup> | % body N of <i>Symbiodinium</i> | Reference  |
|--------------------------|---------------------|--------------------------------------------------------------------------|------------------------------|--------------------------------------------------------------|---------------------------------------------|---------------------------------|------------|
| <i>Synechococcus</i> sp. | Replete             | <b>127</b>                                                               | 0.05                         | 6.4                                                          | 21                                          | 30                              | This study |
| <i>H. akashiwo</i>       | Replete             | <b>1.2</b>                                                               | 13                           | 15.6                                                         | 21                                          | 74                              | This study |
| <i>H. akashiwo</i>       | F-N                 | <b>3.7</b>                                                               | 13                           | 48.1                                                         | 21                                          | 229                             | This study |
| <i>H. akashiwo</i>       | F-NP                | <b>1.7</b>                                                               | 13                           | 22.1                                                         | 21                                          | 105                             | This study |

ANPD, acquired nitrogen by a predator cell per day; F-N, nitrate depletion; F-NP, both nitrate and phosphate depletion;  $I_{max}$ , maximum ingestion rate; NPA, nitrogen content per algal prey cell; NPP, nitrogen content per predator cell used in each experiment; % body N of *Symbiodinium*, percentage of daily acquired nitrogen to the predator's body nitrogen. NPA and NPP for *Synechococcus* sp. and *Symbiodinium* sp. were obtained from Bertilsson et al. (1) and Domotor and D'Elia (2). Bold: Measured value.

- Bertilsson S, Berglund O, Karl DM, Chisholm SW (2003) Elemental composition of marine *Prochlorococcus* and *Synechococcus*. Implications for the ecological stoichiometry of the sea. *Limnol Oceanogr* 48:1721–1731.
- Domotor SL, D'Elia CF (1984) Nutrient uptake kinetics and growth of zooxanthellae maintained in laboratory culture. *Mar Biol* 80:93–101.

**Table S4. Nitrogen acquisition of *Symbiodinium* spp. from dissolved inorganic nitrogen and urea**

| Nitrogen type | NUC-1, 10 <sup>-16</sup> mol N <i>Symbiodinium</i> <sup>-1</sup> min <sup>-1</sup> | NUC-2, pmol N <i>Symbiodinium</i> <sup>-1</sup> d <sup>-1</sup> | ANPD, pg N <i>Symbiodinium</i> <sup>-1</sup> d <sup>-1</sup> | NPP, pg N <i>Symbiodinium</i> <sup>-1</sup> | % body N of <i>Symbiodinium</i> | Reference |
|---------------|------------------------------------------------------------------------------------|-----------------------------------------------------------------|--------------------------------------------------------------|---------------------------------------------|---------------------------------|-----------|
| Ammonium      | <b>11.99</b>                                                                       | 1.727                                                           | 24.2                                                         | 21                                          | 115                             | (1)       |
| Ammonium      |                                                                                    | <b>0.507</b>                                                    | 7.1                                                          | 21                                          | 34                              | (2)       |
| Nitrate       | <b>2.33</b>                                                                        | 0.336                                                           | 4.7                                                          | 21                                          | 22                              | (1)       |
| Nitrate       | <b>0.55</b>                                                                        | 0.079                                                           | 1.1                                                          | 19                                          | 6                               | (3)       |
| Nitrite       | <b>2.88</b>                                                                        | 0.415                                                           | 5.8                                                          | 21                                          | 28                              | (1)       |
| Urea          |                                                                                    | 0.0024*                                                         | 0.034                                                        | 21                                          | 0.2                             | (4)       |

ANPD, acquired nitrogen by a predator cell per day; NPP, nitrogen content per predator cell used in each experiment; NUC, nitrogen uptake by a *Symbiodinium* cell in a time; % body N of *Symbiodinium*, percentage of daily acquired nitrogen to the predator's body nitrogen. Bold: Measured value.

\*Calculated from a maximum nitrogen uptake rate of 0.1 nmol N cm<sup>-2</sup>h<sup>-1</sup> obtained from Grover et al. (4).

- D'Elia CF, Domotor SL, Webb KL (1983) Nutrient uptake kinetics of freshly isolated zooxanthellae. *Mar Biol* 75:157–167.
- McAuley PJ, Smith VJ (1995) Effect of diel photoperiod on nitrogen metabolism of cultured and symbiotic zooxanthellae. *Mar Biol* 123:145–152.
- Domotor SL, D'Elia CF (1984) Nutrient uptake kinetics and growth of zooxanthellae maintained in laboratory culture. *Mar Biol* 80:93–101.
- Grover R, Maguer J-F, Allemand D, Ferrier-Pages C (2006) Urea uptake by the scleractinian coral *Stylophora pistillata*. *J Exp Mar Biol Ecol* 332:216–225.

**Table S5. Estimated removal of *Synechococcus* spp. (prey) by free-living *Symbiodinium* cells (predators) over 1 h at different prey and predator densities in the waters of Lizard Island, Australia**

| <i>Synechococcus</i> density, cells mL <sup>-1</sup> | <i>Symbiodinium</i> density, cells mL <sup>-1</sup> | IR    | PIR   | % (h) |
|------------------------------------------------------|-----------------------------------------------------|-------|-------|-------|
| 5,000                                                | 47                                                  | 0.067 | 3     | 0.1   |
| 5,000                                                | 444                                                 | 0.067 | 30    | 0.6   |
| 5,000                                                | 810                                                 | 0.067 | 54    | 1.1   |
| 5,000                                                | 1,357                                               | 0.067 | 91    | 1.8   |
| 5,000                                                | 2,266                                               | 0.067 | 152   | 3.0   |
| 118,000                                              | 47                                                  | 1.231 | 58    | 0.05  |
| 118,000                                              | 444                                                 | 1.231 | 547   | 0.5   |
| 118,000                                              | 810                                                 | 1.231 | 997   | 0.8   |
| 118,000                                              | 1,357                                               | 1.231 | 1,670 | 1.4   |
| 118,000                                              | 2,266                                               | 1.231 | 2,789 | 2.4   |
| 200,000                                              | 47                                                  | 1.797 | 84    | 0.04  |
| 200,000                                              | 444                                                 | 1.797 | 798   | 0.4   |
| 200,000                                              | 810                                                 | 1.797 | 1,456 | 0.7   |
| 200,000                                              | 1,357                                               | 1.797 | 2,439 | 1.2   |
| 200,000                                              | 2,266                                               | 1.797 | 4,072 | 2.0   |

IR, ingestion rate (prey eaten *Symbiodinium*<sup>-1</sup>h<sup>-1</sup>); PIR, population ingestion rate (prey eaten mL<sup>-1</sup> h<sup>-1</sup>); % (h), percentage of removed prey cells relative to the initial prey density over 1 h. Data on densities were obtained from Moriarty et al. (1) and Littman et al. (2).

- Moriarty DJW, Pollard PC, Hunt WG (1985) Temporal and spatial variation in bacterial production in the water column over a coral reef. *Mar Biol* 85:285–292.
- Littman RA, van Oppen MJH, Willis BL (2008) Methods for sampling free-living *Symbiodinium* (zooxanthellae) and their distribution and abundance at Lizard Island (Great Barrier Reef). *J Exp Mar Biol Ecol* 364:48–53.
